# Supplementary material
Source: PubMed Central journal article supplement (PMC8035708)
Supplement: NIHMS1685760-supplement-Supplemental_Information.pdf [file NIHMS1685760-supplement-Supplemental_Information.pdf]

## **Supplemental Information**

# **Poly(ethylene glycol)-poly(beta-amino ester)-based nanoparticles for suicide gene therapy enhance brain penetration and extend survival in a preclinical human glioblastoma orthotopic xenograft model**

Jayoung Kim<sup>1,2</sup>, Sujan K. Mondal<sup>3</sup>, Stephany Y. Tzeng<sup>1,2</sup>, Yuan Rui<sup>1,2</sup>, Rawan Al-kharboosh<sup>3</sup>, Kristen K. Kozielski<sup>1,2,4</sup>, Adip G. Bhargav<sup>3,5</sup>, Cesar A. Garcia<sup>3</sup>, Alfredo Quiñones-Hinojosa<sup>3,\*</sup>, Jordan J. Green<sup>1,2,6,7,8,\*</sup>

<sup>1</sup> Department of Biomedical Engineering, Johns Hopkins School of Medicine, Baltimore, MD 21231

<sup>2</sup> Translational Tissue Engineering Center and Institute for NanoBioTechnology, Johns Hopkins School of Medicine, Baltimore, MD 21231

<sup>3</sup> Department of Neurosurgery, Mayo Clinic, Jacksonville, FL 32224

<sup>4</sup> Max Planck Institute for Intelligent Systems, Heisenbergstr. 3, Stuttgart, 70569, Germany

<sup>5</sup> Mayo Clinic College of Medicine and Science, Mayo Clinic, Rochester, Minnesota

<sup>6</sup> Department of Neurosurgery, Johns Hopkins School of Medicine, Baltimore, MD 21231

<sup>7</sup> Department of Oncology, the Sidney Kimmel Comprehensive Cancer, and the Bloomberg-Kimmel Institute for Cancer Immunotherapy, Johns Hopkins School of Medicine, Baltimore, MD 21231

<sup>8</sup> Department of Ophthalmology, Department of Materials Science and Engineering, and Department of Chemical and Biomolecular Engineering, Johns Hopkins University, Baltimore, MD 21231

\* Co-corresponding authors and to whom correspondence should be addressed:  
Quinones-Hinojosa.Alfredo@mayo.edu (AQH) and green@jhu.edu (JJG)

## **Table of Contents**

Figure S1. Schematic diagram of cannula implantation.

Figure S2. Representative image of nanoparticle penetration measurement.

Figure S3. <sup>1</sup>H NMR of PEG-PBAE polymers.

Figure S4. Transfection efficacy of PEG-PBAE-based NPs in GBM1A and BTIC375 cells.

Figure S5. Schematic diagram illustrating GCV activation and bystander effect.

Table S1. Effective mass ratios of ePBAE and PEG-PBAE polymers in NP formulations.

Table S2. Statistical significance in day 6 cell viability after pHSV-tk + GCV treatment.

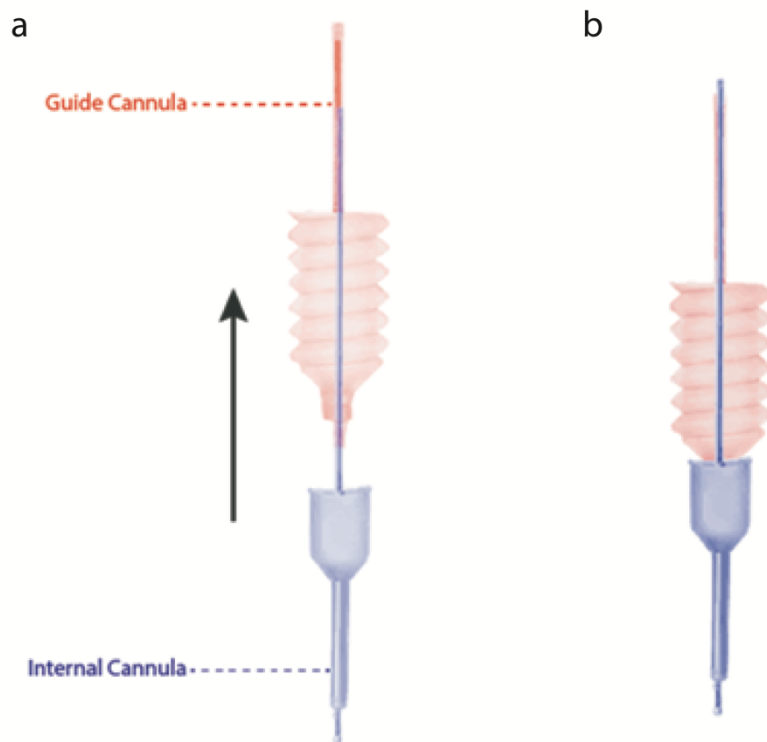

**Figure S1.** (a) Schematic depicting the components and assembly of the cannula and (b) the final assembled cannula.

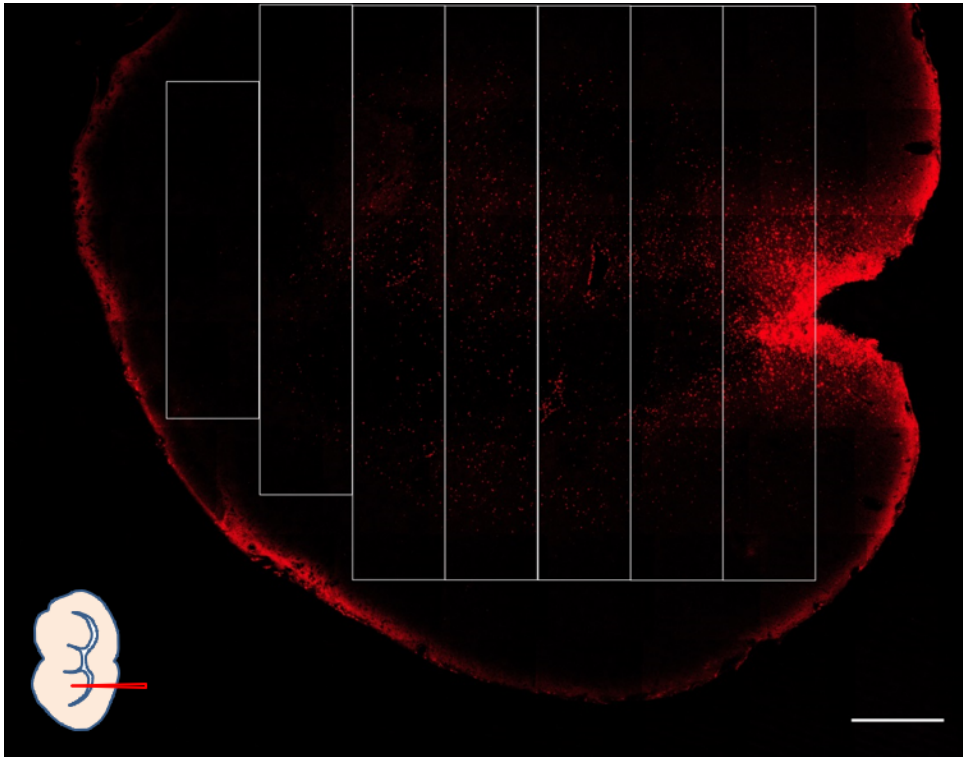

**Figure S2.** Representative image of nanoparticle penetration measurement. Width of each rectangle is 500  $\mu\text{m}$  (scale bar = 500  $\mu\text{m}$ ).

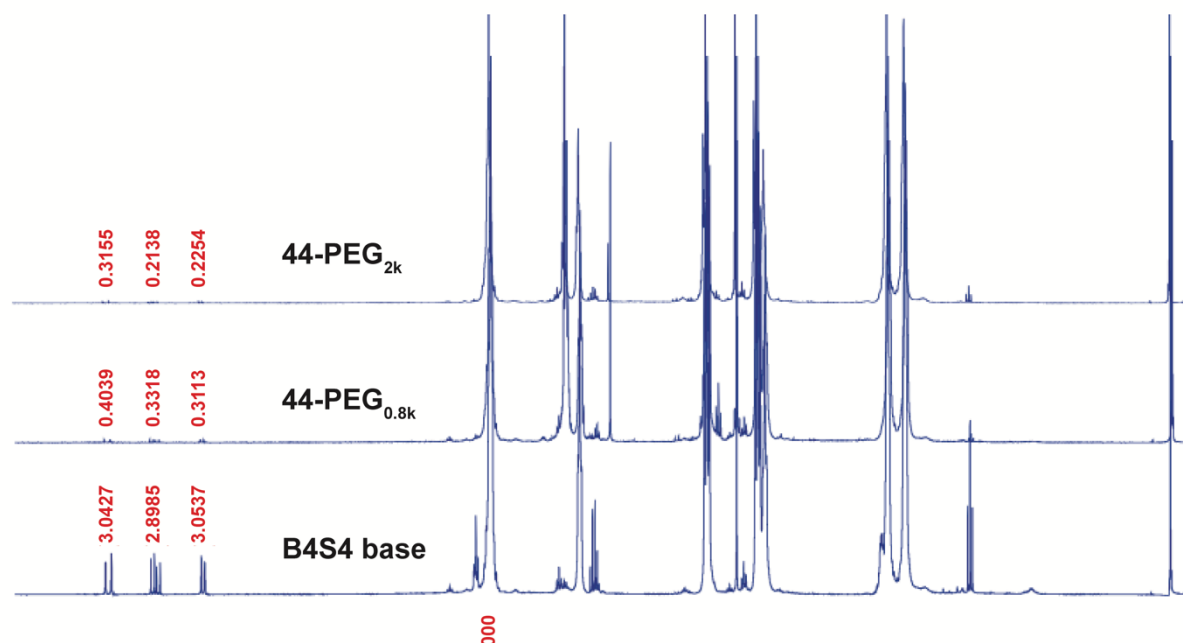

**Figure S3. <sup>1</sup>H-NMR.** <sup>1</sup>H-NMR spectra of B4S4 base PBAE polymer and 44-PEG<sub>0.8k</sub> and 44-PEG<sub>2k</sub> PEG-PBAE polymers. The absence of peaks for hydrogens from acrylate groups in 44-PEG<sub>0.8k</sub> and 44-PEG<sub>2k</sub> PEG-PBAE polymers shows complete reaction of PEG-thiol conjugation.

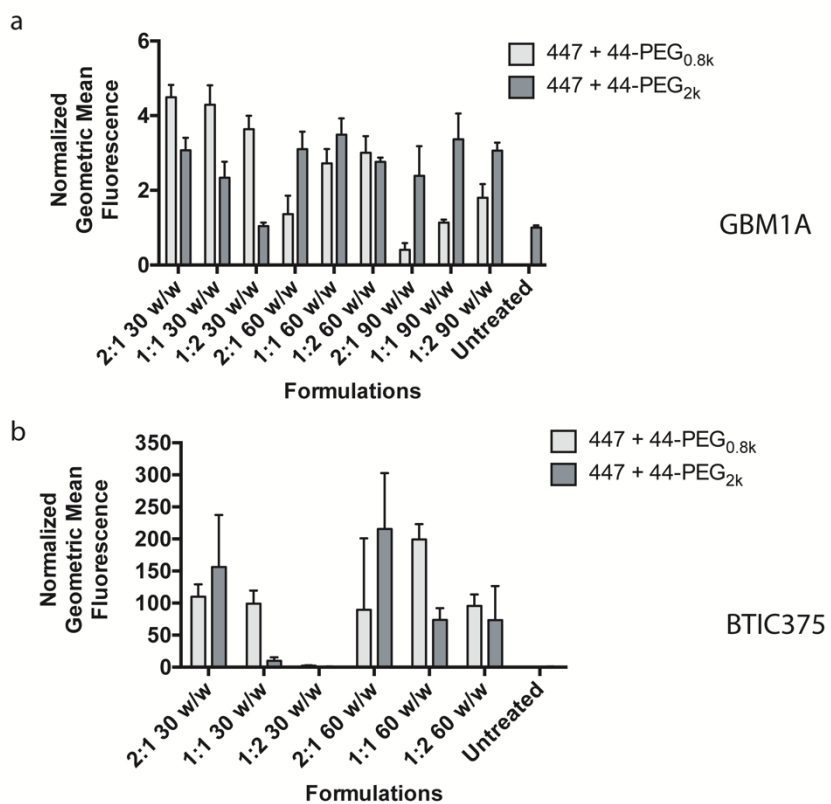

**Figure S4. Transfection efficacy of PEG-PBAE-based NPs in GBM1A and BTIC375 cells.** Geometric mean fluorescence intensity of pEGFP expression after treatment with 18 or 12 PEG-PBAE NP formulations normalized to untreated control in (a) GBM1A and (b) BTIC375 cells (n=4, mean ± s.d.).

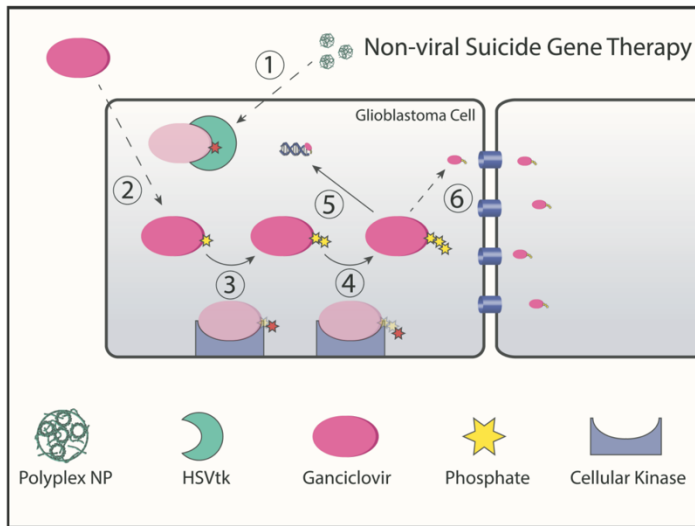

**Figure S5. Schematic diagram illustrating GCV activation and bystander effect.** (1) Gene delivery, (2) GCV entry and HSVtk-mediated activation, (3-4) GCV cellular activation, (5) inhibition of DNA synthesis, and (6) bystander effect.

| ePBAE | PEG-PBAE               | ePBAE:PEG-PBAE | Total polymer:DNA | ePBAE:PEG-PBAE:DNA |
|-------|------------------------|----------------|-------------------|--------------------|
| any   | -                      | -              | 30                | 30 : 0 : 1         |
| any   | -                      | -              | 60                | 60 : 0 : 1         |
| any   | -                      | -              | 90                | 90 : 0 : 1         |
| 447   | 44-PEG <sub>0.8k</sub> | 2:1            | 30                | 20:10:1            |
| 447   | 44-PEG <sub>0.8k</sub> | 1:1            | 30                | 15:15:1            |
| 447   | 44-PEG <sub>0.8k</sub> | 1:2            | 30                | 10:20:1            |
| 447   | 44-PEG <sub>0.8k</sub> | 2:1            | 60                | 40:20:1            |
| 447   | 44-PEG <sub>0.8k</sub> | 1:1            | 60                | 30:30:1            |
| 447   | 44-PEG <sub>0.8k</sub> | 1:2            | 60                | 20:40:1            |
| 447   | 44-PEG <sub>0.8k</sub> | 2:1            | 90                | 60:30:1            |
| 447   | 44-PEG <sub>0.8k</sub> | 1:1            | 90                | 45:45:1            |
| 447   | 44-PEG <sub>0.8k</sub> | 1:2            | 90                | 30:60:1            |
| 447   | 44-PEG <sub>2k</sub>   | 2:1            | 30                | 20:10:1            |
| 447   | 44-PEG <sub>2k</sub>   | 1:1            | 60                | 15:15:1            |
| 447   | 44-PEG <sub>2k</sub>   | 1:2            | 90                | 10:20:1            |
| 447   | 44-PEG <sub>2k</sub>   | 2:1            | 30                | 40:20:1            |
| 447   | 44-PEG <sub>2k</sub>   | 1:1            | 60                | 30:30:1            |
| 447   | 44-PEG <sub>2k</sub>   | 1:2            | 90                | 20:40:1            |
| 447   | 44-PEG <sub>2k</sub>   | 2:1            | 30                | 60:30:1            |
| 447   | 44-PEG <sub>2k</sub>   | 1:1            | 60                | 45:45:1            |
| 447   | 44-PEG <sub>2k</sub>   | 1:2            | 90                | 30:60:1            |

**Table S1. Effective mass ratios of ePBAE and PEG-PBAE polymers in NP formulations.**

| Day 6    |             | PBAE |    |     |      |      |      |      |
|----------|-------------|------|----|-----|------|------|------|------|
| PEG-PBAE | GCV (µg/mL) | 0    | 5  | 10  | 20   | 50   | 100  | 200  |
|          | 0           | -    | ns | *** | **** | **** | **** | **** |
|          | 5           | -    | -  | ns  | **** | **** | **** | **** |
|          | 10          | -    | -  | -   | ns   | **** | **** | **** |
|          | 20          | -    | -  | -   | -    | **** | ns   | ns   |
|          | 50          | -    | -  | -   | -    | -    | ***  | **** |
|          | 100         | -    | -  | -   | -    | -    | -    | ns   |
|          | 200         | -    | -  | -   | -    | -    | -    | -    |

| Day 6 |             | PBAE |    |     |      |      |      |      |
|-------|-------------|------|----|-----|------|------|------|------|
| PBAE  | GCV (µg/mL) | 0    | 5  | 10  | 20   | 50   | 100  | 200  |
|       | 0           | -    | ns | *** | **** | **** | **** | **** |
|       | 5           | -    | -  | *** | **** | **** | **** | **** |
|       | 10          | -    | -  | -   | **** | **** | **** | **** |
|       | 20          | -    | -  | -   | -    | **** | **** | **** |
|       | 50          | -    | -  | -   | -    | -    | **** | **** |
|       | 100         | -    | -  | -   | -    | -    | -    | ns   |
|       | 200         | -    | -  | -   | -    | -    | -    | -    |

| Day 6    |             | PEG-PBAE |    |      |      |      |      |      |
|----------|-------------|----------|----|------|------|------|------|------|
| PEG-PBAE | GCV (µg/mL) | 0        | 5  | 10   | 20   | 50   | 100  | 200  |
|          | 0           | -        | ns | **** | **** | **** | **** | **** |
|          | 5           | -        | -  | **** | **** | **** | **** | **** |
|          | 10          | -        | -  | -    | **** | **** | **** | **** |
|          | 20          | -        | -  | -    | -    | **   | **** | **** |
|          | 50          | -        | -  | -    | -    | -    | *    | ***  |
|          | 100         | -        | -  | -    | -    | -    | -    | ns   |
|          | 200         | -        | -  | -    | -    | -    | -    | -    |

**Table S2. Statistical significance in day 6 cell viability between conditions treated with PBAE, PEG-PBAE NP, and different GCV concentrations.**
